# Supplementary material for: An unprecedented all helical 3D network and a rarely observed non-interpenetrated octahedral network in homochiral Cu(II) MOFs: effect of steric bulk and π–π stacking interactions of the ligand backbone
Source: Royal Society of Chemistry journal article supplement (doi:10.1039/b820087b), 2009-01-01

## Electronic Supporting Information (ESI)

An unprecedented all helical 3D network and a rarely observed **microporous non-interpenetrated** octahedral network in homochiral Cu(II) MOFs: Effect of steric bulk and  $\pi$ - $\pi$  stacking interactions of the ligand backbone

Subhabrata Banerjee, N. N. Adrash and Parthasarathi Dastidar\*

Department of Organic Chemistry,  
Indian Association for the Cultivation of Science (IACS)  
Jadavpur, 2A&2B Raja S C Mullick Road, Kolkata – 700032,  
West Bengal, India  
E-mail: [parthod123@rediffmail.com](mailto:parthod123@rediffmail.com); [ocpd@iacs.res.in](mailto:ocpd@iacs.res.in)

The ligating topology of the ligands is conformation dependent. It may be noted that the backbone of the ligand has two carbonyl groups which are expected to be oriented in opposite fashion in order to cancel out the  $>C=O$  dipole. Thus, keeping the backbone of the ligand in this fashion, four plausible conformations may be envisaged (Scheme S1).

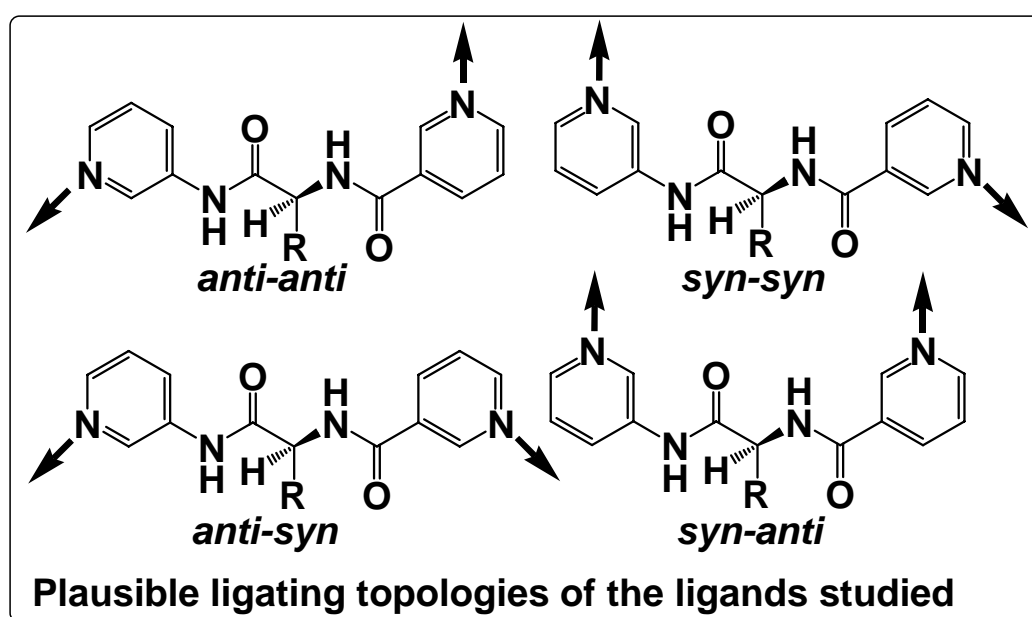

Scheme S1

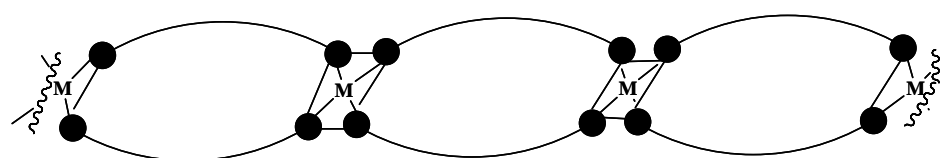

**1D looped chain topology**

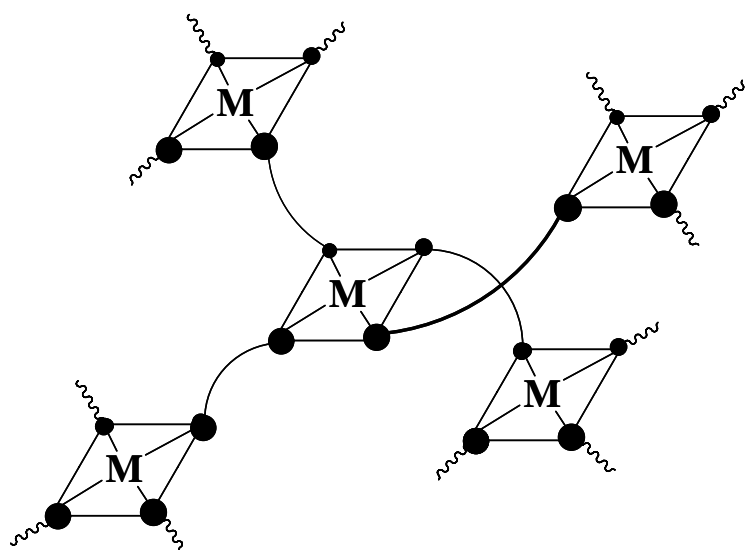

**Dendritic propagation of metal-ligand assembly**

**Scheme S2**

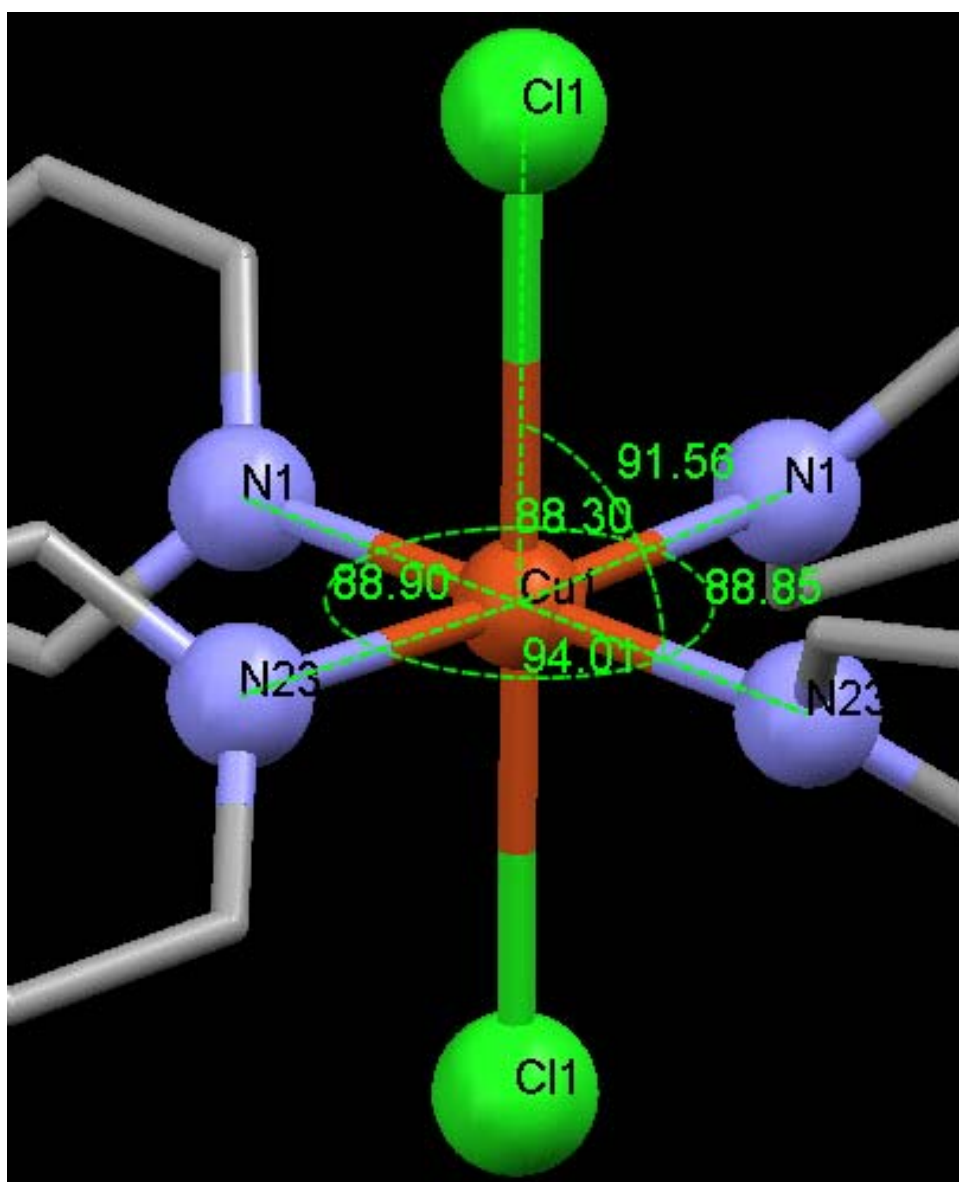

**Figure S1:** Metal coordination geometry in MOF 1

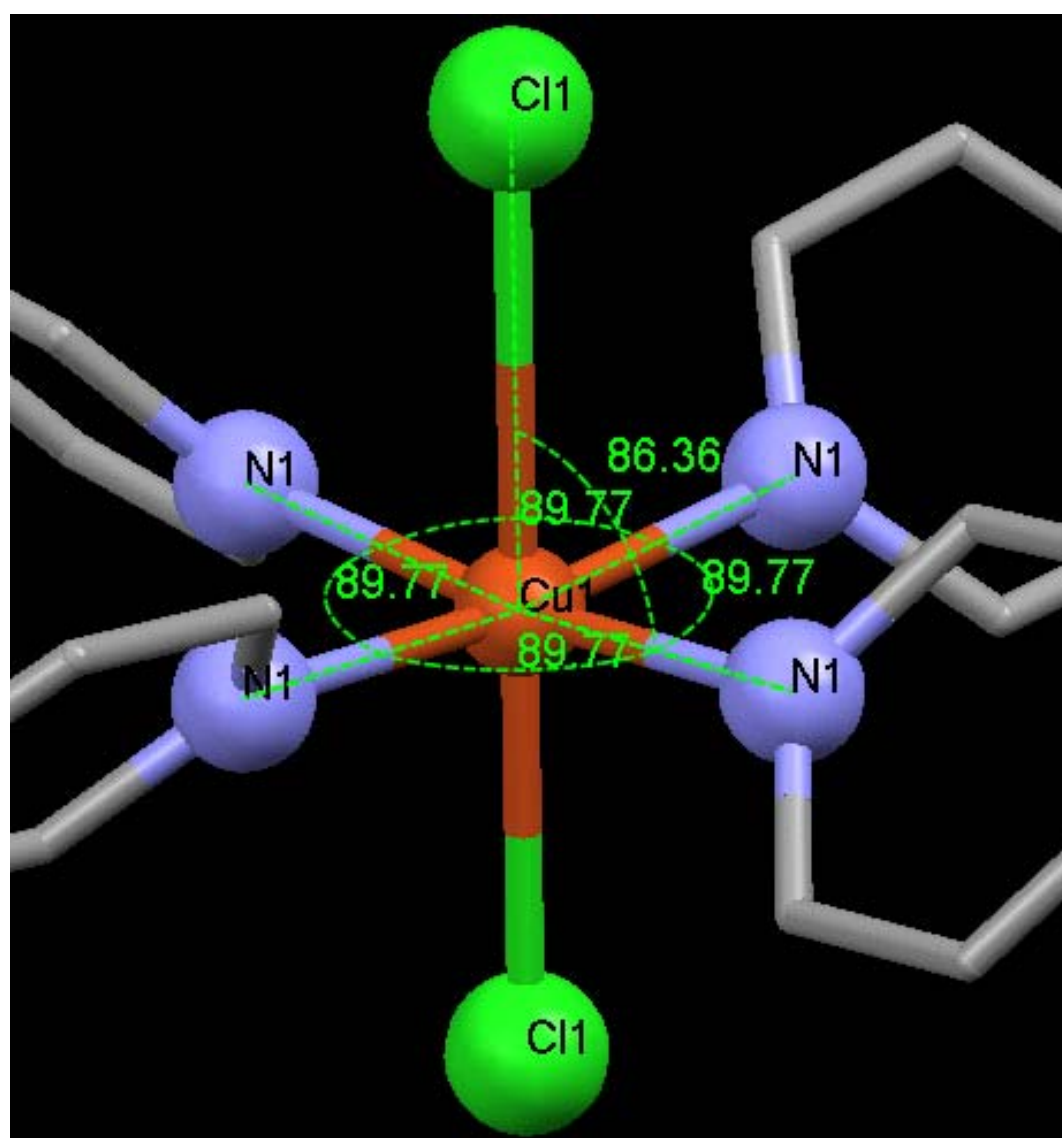

**Figure S2:** Metal coordination geometry in MOF 2

## TGA of MOF-1 and MOF-2

### MOF-1

Sample: SB0401B  
Size: 4.8120 mg  
Method: SB0401B  
Comment: 24.07.08

DSC-TGA

File: C:\SDT\P. DASTIDAR\SHUBHA\SB0401B  
Operator: ANN  
Run Date: 24-Jul-2008 23:53  
Instrument: SDT Q600 V8.2 Build 100

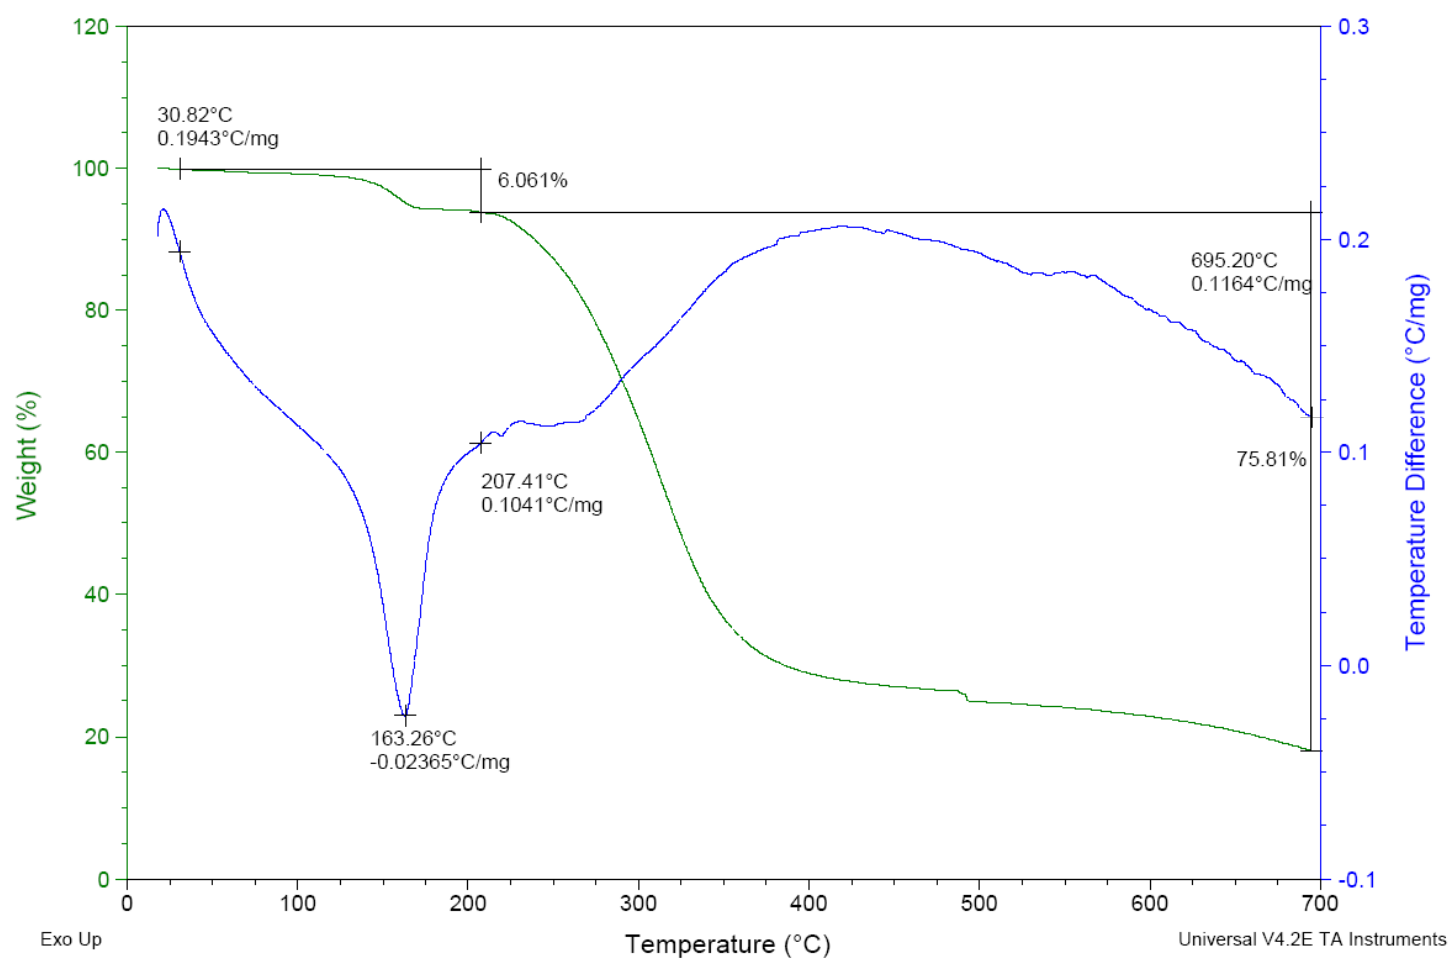

## MOF 2

Sample: SB0416D  
Size: 4.3020 mg  
Method: SB0416D  
Comment: 26-08-08

### DSC-TGA

File: C:\...\SDT.P. DASTIDAR\SHUBHA\SB0416D  
Operator: ANN  
Run Date: 26-Aug-2008 19:52  
Instrument: SDT Q600 V8.2 Build 100

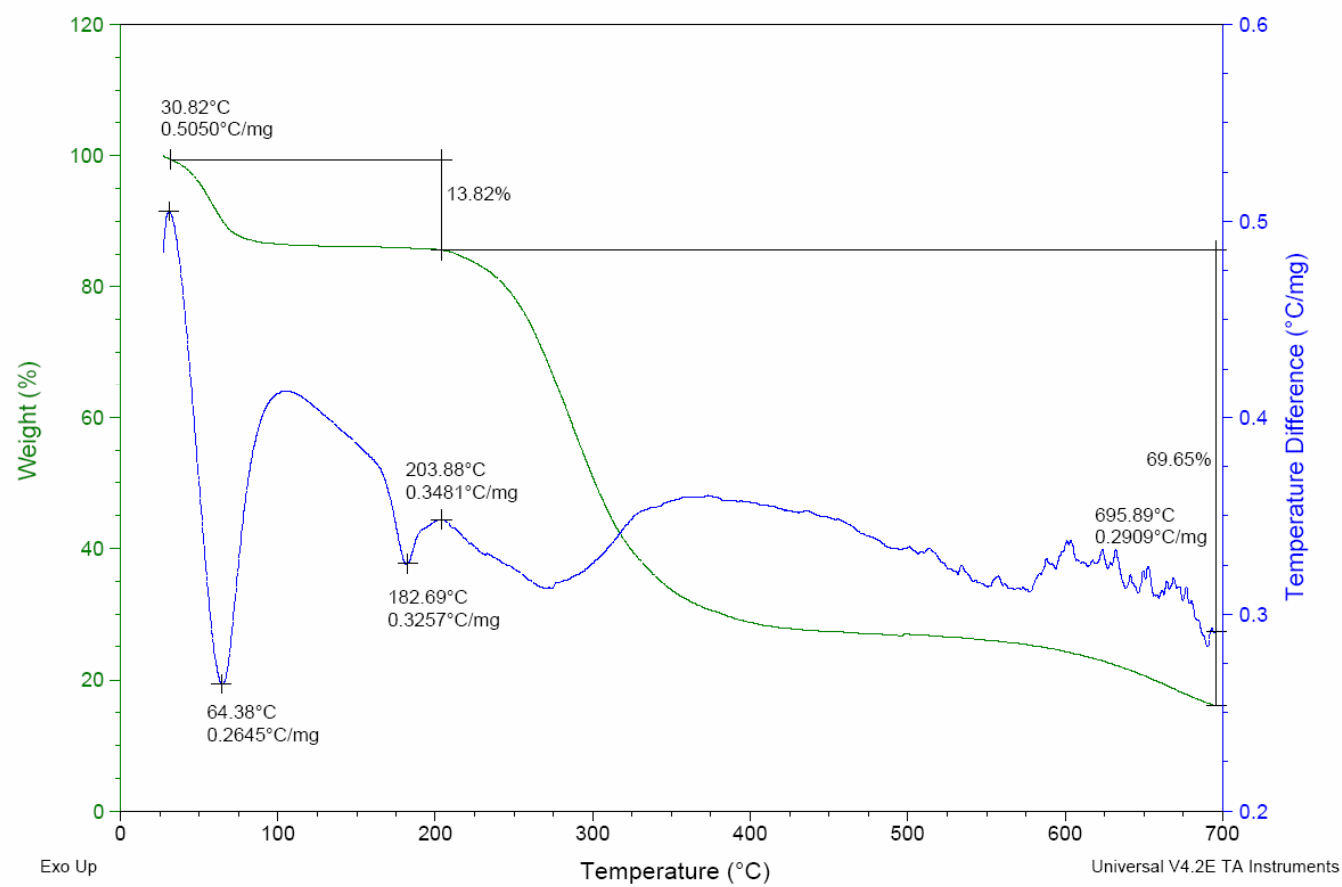

Supplement: b820087b.pdf [file b820087b.pdf]
